# Supplementary material for: Trends, Variation, and Factors Influencing Antibiotic Prescribing: A Longitudinal Study in Primary Care Using a Multilevel Modelling Approach
Source: MDPI journal article supplement (doi:10.3390/antibiotics11010017), 2021-12-24
Supplement: s1 [file s1]

## Supplementary Material

**Table S1.** The standardized number of prescriptions by antibiotic class in the period 2014-2020.

|                                          | 2014  | 2015  | 2016  | 2017  | 2018  | 2019  | 2020  |
|------------------------------------------|-------|-------|-------|-------|-------|-------|-------|
| Penicillins                              | 442.4 | 427.6 | 424.9 | 389.4 | 372.2 | 357.6 | 265.4 |
| Cephalosporins and other beta-lactams    | 40.1  | 38.5  | 35.6  | 32.6  | 31.1  | 30.4  | 31.2  |
| Tetracyclines                            | 97.0  | 99.7  | 104.1 | 102.7 | 101.5 | 103.1 | 88.4  |
| Aminoglycosides                          | 0.3   | 0.3   | 0.4   | 0.5   | 0.2   | 0.4   | 0.4   |
| Macrolides                               | 104.2 | 100.7 | 98.6  | 88.7  | 80.6  | 75.6  | 56.9  |
| Clindamycin and lincomycin               | 0.9   | 1.1   | 1.2   | 1.4   | 1.4   | 1.2   | 1.1   |
| Some other antibacterials                | 3.0   | 3.2   | 3.5   | 3.8   | 4.1   | 4.4   | 4.5   |
| Sulfonamides and trimethoprim            | 85.3  | 82.6  | 82.6  | 80.1  | 75.8  | 72.0  | 64.6  |
| Antituberculosis drugs                   | 2.0   | 2.0   | 1.9   | 2.0   | 1.8   | 1.8   | 1.7   |
| Antileprotic drugs                       | 1.7   | 1.7   | 1.6   | 1.7   | 1.8   | 1.9   | 1.9   |
| Metronidazole, tinidazole and ornidazole | 12.1  | 11.7  | 11.4  | 11.1  | 10.6  | 10.3  | 9.5   |
| Quinolones                               | 19.3  | 17.9  | 17.3  | 16.1  | 14.5  | 12.1  | 10.1  |
| Urinary-tract infection drugs            | 44.2  | 44.2  | 46.1  | 45.1  | 44.3  | 46.7  | 47.1  |
